# Supplementary material
Source: PubMed Central journal article supplement (PMC1544223)
Supplement: pnas_0510741103_4.pdf [file pnas_0510741103_4.pdf]

**Table 3.** Carcinogen-induced LOH does not generate genetically unstable cells

| <b>Clone</b> | <b>Inducer<br/>EL LOH</b> | <b>Genotype</b>                   | <b>Treatment</b> | <b>Frequency<br/>TK loss</b> | <b>Ratio</b> |
|--------------|---------------------------|-----------------------------------|------------------|------------------------------|--------------|
| C8TK2        | None                      | TK <sup>+</sup> EL <sup>+/-</sup> | None             | 1.9 × 10 <sup>-5</sup>       | } 2.5        |
| C8TK1sN      | Spontaneous               | TK <sup>+</sup> EL <sup>-/-</sup> | None             | 4.7 × 10 <sup>-5</sup>       |              |
| C8TK2mN      | MNU                       | TK <sup>+</sup> EL <sup>-/-</sup> | None             | 1.3 × 10 <sup>-5</sup>       | } .24        |
| C8TK2sN      | Spontaneous               | TK <sup>+</sup> EL <sup>-/-</sup> | None             | 5.3 × 10 <sup>-5</sup>       |              |
| C8TK2hN      | HU                        | TK <sup>+</sup> EL <sup>-/-</sup> | None             | 1.2 × 10 <sup>-5</sup>       | } .23        |
| C8TK2sN      | Spontaneous               | TK <sup>+</sup> EL <sup>-/-</sup> | HU               | 2.8 × 10 <sup>-4</sup>       | } 1.8        |
| C8TK2hN      | HU                        | TK <sup>+</sup> EL <sup>-/-</sup> | HU               | 4.9 × 10 <sup>-4</sup>       |              |
| C8TK2sN      | Spontaneous               | TK <sup>+</sup> EL <sup>-/-</sup> | MNU              | 2.9 × 10 <sup>-4</sup>       | } 1.6        |
| C8TK2mN      | MNU                       | TK <sup>+</sup> EL <sup>-/-</sup> | MNU              | 4.5 × 10 <sup>-4</sup>       |              |

The HSV thymidine kinase (*TK*) gene was introduced into cells containing an entrapment mutation in the *Hesx1* gene. A *TK*-expressing (TK<sup>+</sup>) clone (C8TK2) was used to select for cells that had undergone LOH at the entrapment locus (EL) spontaneously (C8TK2sN) or after treatment with HU (C8TK2hN) or MNU (C8TK2mN). The frequencies of spontaneous *TK* gene loss (Treatment = none) or *TK* gene loss after treatment with HU or MNU were compared in cells with (EL<sup>-/-</sup>) and without prior selection for LOH (EL<sup>+/-</sup>) at the entrapment locus, and the differences were expressed as the indicated ratios.
