# Supplementary material
Source: PubMed Central journal article supplement (PMC1544223)

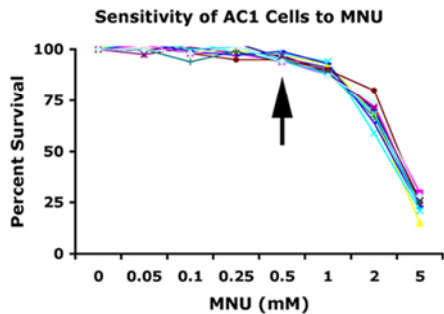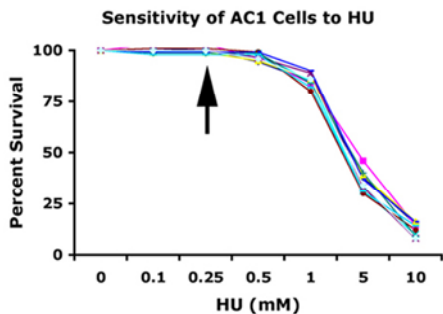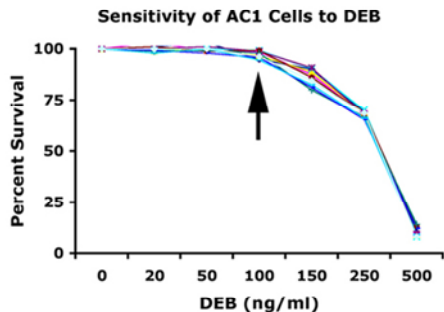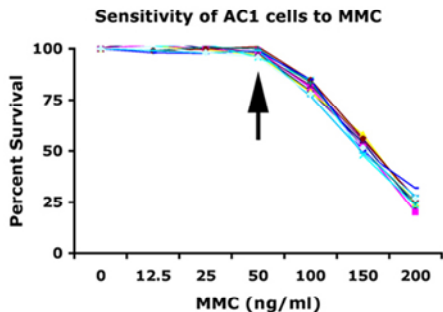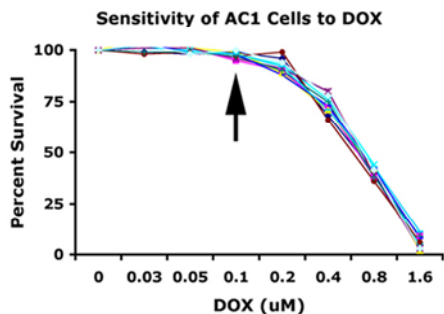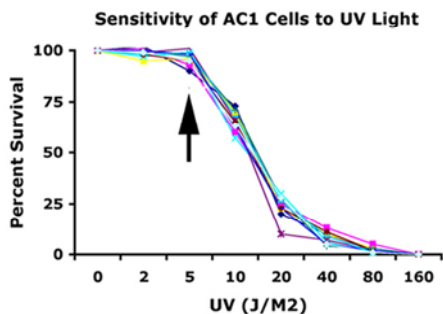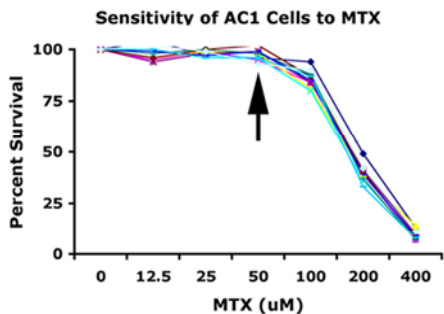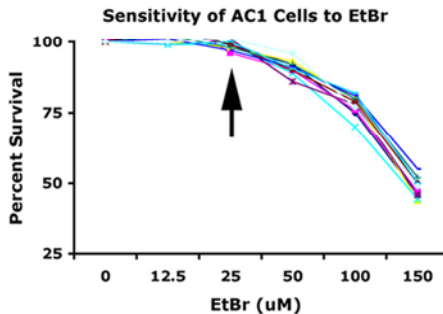

Supplement: pnas_0510741103_1.pdf [file pnas_0510741103_1.pdf]

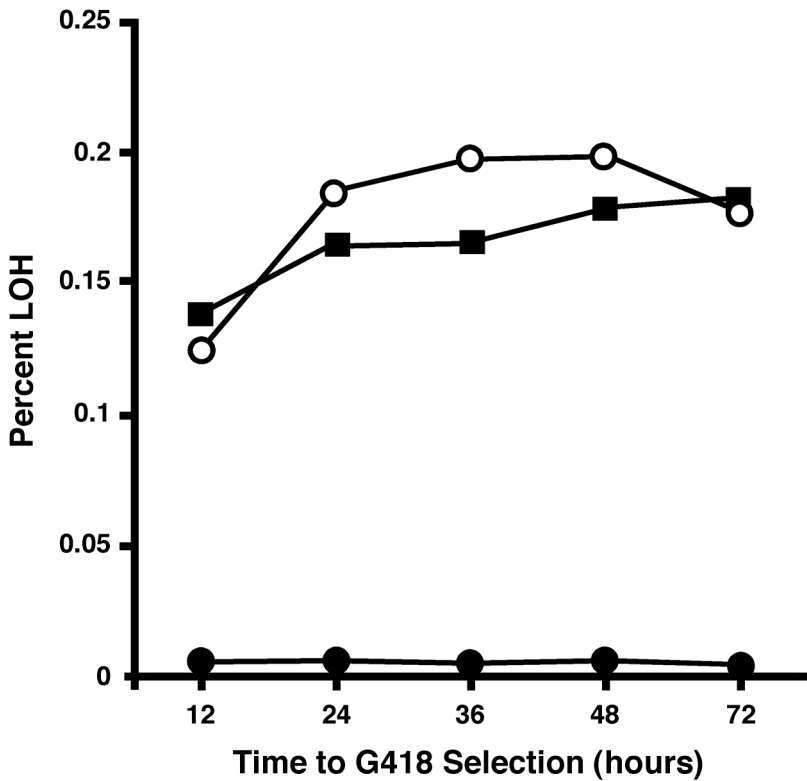

Supplement: pnas_0510741103_2.pdf [file pnas_0510741103_2.pdf]
